# Supplementary material
Source: publisher site journal article supplement (https://www.dovepress.com/article/supplementary_file/587828/Table%20S1.docx)
Supplement: Supplementary file 1 [file Table%20S1.docx]

| Variable | Em | | |
| --- | --- | --- | --- |
| β | 95%CI | P-value |
| Female age (y) | -0.062 | -0.108, 0.017 | 0.008 |
| Number of cycles (n) | 0.092 | -0.036, 0.220 | 0.161 |
| BMI (kg/m2) | -0.073 | -0.136, 0.124 | 0.067 |
| Infertility duration (y) | -0.144 | -0.136, 0.021 | 0.044 |
| E2/100 (pg/mL) | -0.023 | -0.039, -0.008 | 0.003 |
| P (ng/mL) | -0.219 | -0.584, 0.146 | 0.242 |
| TMXF addition | 0.872 | 0.560, 1.183 | 0.001 |

Table S1. Univariate analysis for the endometrial thickness.

E2, estrogen before endometrial transformation; P, progesterone before endometrial transformation; Em, endometrial thickness before endometrial transformation.
